# Supplementary material for: Absolute Memory for Tempo in Musicians and Non-Musicians
Source: PLoS One. 2016 Oct 19;11(10):e0163558. doi: 10.1371/journal.pone.0163558 (PMC5070877; doi:10.1371/journal.pone.0163558)
Supplement: S1 Data — (XLSX) [file pone.0163558.s001.xlsx]

## Sheet: Dataset
Subject	Age	Training	Years of Study	Order	Target	Task	Response	Error	Correct Response
1	21	mus	11	1	80	id	80	0	1
1	21	mus	11	2	113	id	101	-2	0
1	21	mus	11	3	142	id	142	0	1
1	21	mus	11	4	71	id	71	0	1
1	21	mus	11	5	90	id	90	0	1
1	21	mus	11	6	101	id	113	2	0
1	21	mus	11	7	127	id	127	0	1
1	21	mus	11	1	101	prod	118	2.65	0
1	21	mus	11	2	142	prod	202	6.08	0
1	21	mus	11	3	71	prod	77	1.35	0
1	21	mus	11	4	90	prod	117	4.53	0
1	21	mus	11	5	127	prod	144	2.18	0
1	21	mus	11	6	80	prod	98	3.47	0
1	21	mus	11	7	113	prod	104	-1.48	0
2	21	mus	11	1	113	id	101	-2	0
2	21	mus	11	2	142	id	142	0	1
2	21	mus	11	3	127	id	127	0	1
2	21	mus	11	4	90	id	71	-4	0
2	21	mus	11	5	71	id	71	0	1
2	21	mus	11	6	80	id	80	0	1
2	21	mus	11	7	101	id	113	2	0
2	21	mus	11	1	90	prod	92	0.4	1
2	21	mus	11	2	113	prod	140	3.71	0
2	21	mus	11	3	80	prod	100	3.89	0
2	21	mus	11	4	142	prod	176	3.68	0
2	21	mus	11	5	101	prod	117	2.6	0
2	21	mus	11	6	71	prod	77	1.32	0
2	21	mus	11	7	127	prod	148	2.62	0
3	22	mus	10	1	80	id	90	2	0
3	22	mus	10	2	142	id	127	-2	0
3	22	mus	10	3	71	id	80	2	0
3	22	mus	10	4	127	id	113	-2	0
3	22	mus	10	5	90	id	90	0	1
3	22	mus	10	6	113	id	113	0	1
3	22	mus	10	7	101	id	101	0	1
3	22	mus	10	1	101	prod	96	-0.8	1
3	22	mus	10	2	127	prod	146	2.41	0
3	22	mus	10	3	71	prod	54	-4.77	0
3	22	mus	10	4	142	prod	154	1.43	0
3	22	mus	10	5	113	prod	88	-4.31	0
3	22	mus	10	6	90	prod	77	-2.78	0
3	22	mus	10	7	80	prod	62	-4.5	0
4	18	mus	8	1	127	id	127	0	1
4	18	mus	8	2	101	id	101	0	1
4	18	mus	8	3	80	id	71	-2	0
4	18	mus	8	4	90	id	80	-2	0
4	18	mus	8	5	142	id	142	0	1
4	18	mus	8	6	71	id	90	4	0
4	18	mus	8	7	113	id	113	0	1
4	18	mus	8	1	113	prod	100	-2.1	0
4	18	mus	8	2	80	prod	60	-4.99	0
4	18	mus	8	3	127	prod	103	-3.55	0
4	18	mus	8	4	142	prod	158	1.85	0
4	18	mus	8	5	71	prod	50	-6.17	0
4	18	mus	8	6	90	prod	66	-5.33	0
4	18	mus	8	7	101	prod	86	-2.71	0
5	21	mus	8	1	113	id	101	-2	0
5	21	mus	8	2	142	id	127	-2	0
5	21	mus	8	3	127	id	101	-4	0
5	21	mus	8	4	90	id	80	-2	0
5	21	mus	8	5	71	id	71	0	1
5	21	mus	8	6	80	id	80	0	1
5	21	mus	8	7	101	id	90	-2	0
5	21	mus	8	1	90	prod	101	1.93	0
5	21	mus	8	2	113	prod	145	4.36	0
5	21	mus	8	3	80	prod	69	-2.5	0
5	21	mus	8	4	142	prod	181	4.17	0
5	21	mus	8	5	101	prod	114	2.13	0
5	21	mus	8	6	71	prod	69	-0.46	1
5	21	mus	8	7	127	prod	137	1.34	0
6	23	mus	10	1	113	id	113	0	1
6	23	mus	10	2	80	id	90	2	0
6	23	mus	10	3	142	id	142	0	1
6	23	mus	10	4	101	id	101	0	1
6	23	mus	10	5	127	id	127	0	1
6	23	mus	10	6	71	id	80	2	0
6	23	mus	10	7	90	id	113	4	0
6	23	mus	10	1	101	prod	82	-3.52	0
6	23	mus	10	2	142	prod	154	1.38	0
6	23	mus	10	3	80	prod	77	-0.68	1
6	23	mus	10	4	127	prod	164	4.42	0
6	23	mus	10	5	90	prod	93	0.63	1
6	23	mus	10	6	113	prod	98	-2.46	0
6	23	mus	10	7	71	prod	63	-2	0
7	23	mus	11	1	113	id	101	-2	0
7	23	mus	11	2	142	id	127	-2	0
7	23	mus	11	3	80	id	80	0	1
7	23	mus	11	4	101	id	101	0	1
7	23	mus	11	5	71	id	71	0	1
7	23	mus	11	6	127	id	113	-2	0
7	23	mus	11	7	90	id	90	0	1
7	23	mus	11	1	127	prod	115	-1.68	0
7	23	mus	11	2	90	prod	88	-0.42	1
7	23	mus	11	3	142	prod	143	0.11	1
7	23	mus	11	4	71	prod	74	0.73	1
7	23	mus	11	5	113	prod	104	-1.38	0
7	23	mus	11	6	101	prod	84	-3.25	0
7	23	mus	11	7	80	prod	75	-1.19	0
8	26	non	0	1	113	id	101	-2	0
8	26	non	0	2	71	id	71	0	1
8	26	non	0	3	101	id	90	-2	0
8	26	non	0	4	142	id	127	-2	0
8	26	non	0	5	80	id	71	-2	0
8	26	non	0	6	127	id	142	2	0
8	26	non	0	7	90	id	90	0	1
8	26	non	0	1	113	prod	108	-0.84	1
8	26	non	0	2	127	prod	140	1.72	0
8	26	non	0	3	80	prod	76	-0.82	1
8	26	non	0	4	90	prod	85	-0.97	1
8	26	non	0	5	142	prod	131	-1.36	0
8	26	non	0	6	71	prod	66	-1.27	0
8	26	non	0	7	101	prod	89	-2.23	0
9	26	non	5	1	113	id	113	0	1
9	26	non	5	2	80	id	90	2	0
9	26	non	5	3	127	id	142	2	0
9	26	non	5	4	90	id	101	2	0
9	26	non	5	5	71	id	80	2	0
9	26	non	5	6	142	id	142	0	1
9	26	non	5	7	101	id	113	2	0
9	26	non	5	1	80	prod	61	-4.66	0
9	26	non	5	2	127	prod	102	-3.84	0
9	26	non	5	3	71	prod	51	-5.78	0
9	26	non	5	4	142	prod	158	1.68	0
9	26	non	5	5	101	prod	70	-6.22	0
9	26	non	5	6	90	prod	55	-8.68	0
9	26	non	5	7	113	prod	89	-4.14	0
10	19	non	0	1	80	id	90	2	0
10	19	non	0	2	113	id	113	0	1
10	19	non	0	3	142	id	142	0	1
10	19	non	0	4	71	id	71	0	1
10	19	non	0	5	90	id	80	-2	0
10	19	non	0	6	101	id	127	4	0
10	19	non	0	7	127	id	142	2	0
10	19	non	0	1	101	prod	102	0.25	1
10	19	non	0	2	142	prod	108	-4.67	0
10	19	non	0	3	71	prod	53	-5.19	0
10	19	non	0	4	90	prod	73	-3.55	0
10	19	non	0	5	127	prod	90	-6.02	0
10	19	non	0	6	80	prod	68	-2.73	0
10	19	non	0	7	113	prod	78	-6.52	0
11	27	non	0	1	80	id	80	0	1
11	27	non	0	2	90	id	113	4	0
11	27	non	0	3	113	id	142	4	0
11	27	non	0	4	127	id	127	0	1
11	27	non	0	5	101	id	71	-6	0
11	27	non	0	6	142	id	90	-8	0
11	27	non	0	7	71	id	71	0	1
11	27	non	0	1	127	prod	128	0.16	1
11	27	non	0	2	101	prod	100	-0.19	1
11	27	non	0	3	142	prod	153	1.31	0
11	27	non	0	4	80	prod	95	3.06	0
11	27	non	0	5	71	prod	74	0.72	1
11	27	non	0	6	113	prod	101	-1.86	0
11	27	non	0	7	90	prod	75	-3.11	0
12	25	non	0	1	113	id	90	-4	0
12	25	non	0	2	80	id	80	0	1
12	25	non	0	3	90	id	71	-4	0
12	25	non	0	4	142	id	142	0	1
12	25	non	0	5	127	id	127	0	1
12	25	non	0	6	101	id	80	-4	0
12	25	non	0	7	71	id	71	0	1
12	25	non	0	1	101	prod	150	6.84	0
12	25	non	0	2	80	prod	85	1.11	0
12	25	non	0	3	127	prod	150	2.93	0
12	25	non	0	4	113	prod	149	4.84	0
12	25	non	0	5	71	prod	25	-18.08	0
12	25	non	0	6	90	prod	85	-1.04	0
12	25	non	0	7	142	prod	165	2.55	0
13	19	non	0	1	90	id	80	-2	0
13	19	non	0	2	113	id	127	2	0
13	19	non	0	3	142	id	142	0	1
13	19	non	0	4	127	id	127	0	1
13	19	non	0	5	80	id	90	2	0
13	19	non	0	6	101	id	113	2	0
13	19	non	0	7	71	id	80	2	0
13	19	non	0	1	113	prod	104	-1.46	0
13	19	non	0	2	80	prod	94	2.86	0
13	19	non	0	3	142	prod	122	-2.6	0
13	19	non	0	4	101	prod	95	-1.02	0
13	19	non	0	5	90	prod	82	-1.59	0
13	19	non	0	6	71	prod	56	-3.96	0
13	19	non	0	7	127	prod	88	-6.44	0
14	19	non	0	1	113	id	101	-2	0
14	19	non	0	2	90	id	90	0	1
14	19	non	0	3	101	id	113	2	0
14	19	non	0	4	80	id	80	0	1
14	19	non	0	5	142	id	142	0	1
14	19	non	0	6	71	id	71	0	1
14	19	non	0	7	127	id	127	0	1
14	19	non	0	1	80	prod	78	-0.46	1
14	19	non	0	2	71	prod	66	-1.2	0
14	19	non	0	3	90	prod	83	-1.34	0
14	19	non	0	4	113	prod	129	2.25	0
14	19	non	0	5	142	prod	139	-0.36	1
14	19	non	0	6	101	prod	94	-1.24	0
14	19	non	0	7	127	prod	122	-0.72	1
15	30	non	0	1	127	id	127	0	1
15	30	non	0	2	101	id	101	0	1
15	30	non	0	3	71	id	80	2	0
15	30	non	0	4	90	id	90	0	1
15	30	non	0	5	142	id	142	0	1
15	30	non	0	6	113	id	113	0	1
15	30	non	0	7	80	id	71	-2	0
15	30	non	0	1	113	prod	126	1.85	0
15	30	non	0	2	71	prod	62	-2.41	0
15	30	non	0	3	142	prod	166	2.71	0
15	30	non	0	4	90	prod	82	-1.68	0
15	30	non	0	5	127	prod	146	2.37	0
15	30	non	0	6	80	prod	83	0.6	1
15	30	non	0	7	101	prod	101	-0.03	1
16	40	non	0	1	90	id	90	0	1
16	40	non	0	2	71	id	80	2	0
16	40	non	0	3	113	id	113	0	1
16	40	non	0	4	142	id	127	-2	0
16	40	non	0	5	80	id	80	0	1
16	40	non	0	6	101	id	90	-2	0
16	40	non	0	7	127	id	113	-2	0
16	40	non	0	1	80	prod	88	1.57	0
16	40	non	0	2	142	prod	66	-13.15	0
16	40	non	0	3	90	prod	83	-1.41	0
16	40	non	0	4	113	prod	83	-5.26	0
16	40	non	0	5	71	prod	52	-5.28	0
16	40	non	0	6	127	prod	70	-10.42	0
16	40	non	0	7	101	prod	75	-5.17	0
17	25	non	0	1	80	id	80	0	1
17	25	non	0	2	142	id	142	0	1
17	25	non	0	3	71	id	71	0	1
17	25	non	0	4	127	id	142	2	0
17	25	non	0	5	90	id	90	0	1
17	25	non	0	6	113	id	101	-2	0
17	25	non	0	7	101	id	90	-2	0
17	25	non	0	1	101	prod	99	-0.35	1
17	25	non	0	2	127	prod	118	-1.21	0
17	25	non	0	3	71	prod	74	0.78	1
17	25	non	0	4	142	prod	129	-1.71	0
17	25	non	0	5	113	prod	109	-0.69	1
17	25	non	0	6	90	prod	93	0.55	1
17	25	non	0	7	80	prod	89	1.76	0
18	27	non	0	1	127	id	127	0	1
18	27	non	0	2	101	id	80	-4	0
18	27	non	0	3	71	id	71	0	1
18	27	non	0	4	90	id	101	2	0
18	27	non	0	5	142	id	142	0	1
18	27	non	0	6	113	id	127	2	0
18	27	non	0	7	80	id	90	2	0
18	27	non	0	1	113	prod	105	-1.27	0
18	27	non	0	2	71	prod	70	-0.12	1
18	27	non	0	3	142	prod	163	2.4	0
18	27	non	0	4	90	prod	120	5.03	0
18	27	non	0	5	127	prod	167	4.7	0
18	27	non	0	6	80	prod	90	2	0
18	27	non	0	7	101	prod	124	3.56	0
19	23	non	0	1	113	id	113	0	1
19	23	non	0	2	90	id	101	2	0
19	23	non	0	3	101	id	127	4	0
19	23	non	0	4	80	id	90	2	0
19	23	non	0	5	142	id	142	0	1
19	23	non	0	6	71	id	90	4	0
19	23	non	0	7	127	id	127	0	1
19	23	non	0	1	80	prod	74	-1.24	0
19	23	non	0	2	71	prod	82	2.5	0
19	23	non	0	3	90	prod	79	-2.22	0
19	23	non	0	4	113	prod	95	-2.98	0
19	23	non	0	5	142	prod	148	0.76	1
19	23	non	0	6	101	prod	105	0.65	1
19	23	non	0	7	127	prod	111	-2.36	0
20	47	mus	11	1	80	id	90	2	0
20	47	mus	11	2	90	id	113	4	0
20	47	mus	11	3	113	id	142	4	0
20	47	mus	11	4	127	id	142	2	0
20	47	mus	11	5	101	id	127	4	0
20	47	mus	11	6	142	id	142	0	1
20	47	mus	11	7	71	id	71	0	1
20	47	mus	11	1	127	prod	92	-5.6	0
20	47	mus	11	2	101	prod	101	0	1
20	47	mus	11	3	142	prod	131	-1.36	0
20	47	mus	11	4	80	prod	75	-1.22	0
20	47	mus	11	5	71	prod	64	-1.8	0
20	47	mus	11	6	113	prod	109	-0.67	1
20	47	mus	11	7	90	prod	81	-1.91	0
21	26	mus	10	1	113	id	90	-4	0
21	26	mus	10	2	80	id	71	-2	0
21	26	mus	10	3	127	id	127	0	1
21	26	mus	10	4	71	id	90	4	0
21	26	mus	10	5	90	id	113	4	0
21	26	mus	10	6	142	id	142	0	1
21	26	mus	10	7	101	id	101	0	1
21	26	mus	10	1	80	prod	82	0.4	1
21	26	mus	10	2	101	prod	102	0.16	1
21	26	mus	10	3	142	prod	155	1.51	0
21	26	mus	10	4	71	prod	83	2.66	0
21	26	mus	10	5	127	prod	156	3.53	0
21	26	mus	10	6	90	prod	118	4.69	0
21	26	mus	10	7	113	prod	146	4.47	0
22	21	mus	9	1	113	id	113	0	1
22	21	mus	9	2	71	id	71	0	1
22	21	mus	9	3	90	id	90	0	1
22	21	mus	9	4	127	id	127	0	1
22	21	mus	9	5	101	id	113	2	0
22	21	mus	9	6	80	id	80	0	1
22	21	mus	9	7	142	id	127	-2	0
22	21	mus	9	1	127	prod	145	2.28	0
22	21	mus	9	2	80	prod	67	-3.19	0
22	21	mus	9	3	142	prod	178	3.87	0
22	21	mus	9	4	113	prod	111	-0.27	1
22	21	mus	9	5	71	prod	62	-2.42	0
22	21	mus	9	6	101	prod	117	2.5	0
22	21	mus	9	7	90	prod	99	1.59	0
23	22	mus	11	1	101	id	80	-4	0
23	22	mus	11	2	127	id	113	-2	0
23	22	mus	11	3	71	id	71	0	1
23	22	mus	11	4	80	id	80	0	1
23	22	mus	11	5	142	id	142	0	1
23	22	mus	11	6	90	id	90	0	1
23	22	mus	11	7	113	id	127	2	0
23	22	mus	11	1	90	prod	78	-2.49	0
23	22	mus	11	2	113	prod	78	-6.5	0
23	22	mus	11	3	127	prod	115	-1.65	0
23	22	mus	11	4	71	prod	61	-2.66	0
23	22	mus	11	5	80	prod	83	0.56	1
23	22	mus	11	6	101	prod	105	0.73	1
23	22	mus	11	7	142	prod	147	0.6	1
24	20	mus	9	1	113	id	101	-2	0
24	20	mus	9	2	142	id	142	0	1
24	20	mus	9	3	127	id	113	-2	0
24	20	mus	9	4	90	id	80	-2	0
24	20	mus	9	5	71	id	71	0	1
24	20	mus	9	6	101	id	90	-2	0
24	20	mus	9	7	80	id	80	0	1
24	20	mus	9	1	101	prod	99	-0.39	1
24	20	mus	9	2	80	prod	74	-1.27	0
24	20	mus	9	3	142	prod	118	-3.22	0
24	20	mus	9	4	71	prod	57	-3.88	0
24	20	mus	9	5	90	prod	95	0.99	1
24	20	mus	9	6	127	prod	117	-1.37	0
24	20	mus	9	7	113	prod	89	-4.1	0
25	34	mus	11	1	101	id	101	0	1
25	34	mus	11	2	113	id	113	0	1
25	34	mus	11	3	80	id	90	2	0
25	34	mus	11	4	71	id	90	4	0
25	34	mus	11	5	127	id	127	0	1
25	34	mus	11	6	90	id	101	2	0
25	34	mus	11	7	142	id	142	0	1
25	34	mus	11	1	127	prod	101	-0.58	1
25	34	mus	11	2	113	prod	113	-1.52	0
25	34	mus	11	3	71	prod	90	-0.54	1
25	34	mus	11	4	101	prod	90	0.78	1
25	34	mus	11	5	142	prod	127	0.07	1
25	34	mus	11	6	90	prod	101	-0.12	1
25	34	mus	11	7	80	prod	142	-0.02	1
26	24	mus	11	1	113	id	113	0	1
26	24	mus	11	2	127	id	127	0	1
26	24	mus	11	3	101	id	90	-2	0
26	24	mus	11	4	71	id	71	0	1
26	24	mus	11	5	142	id	142	0	1
26	24	mus	11	6	90	id	101	2	0
26	24	mus	11	7	80	id	80	0	1
26	24	mus	11	1	90	prod	105	2.62	0
26	24	mus	11	2	113	prod	136	3.24	0
26	24	mus	11	3	101	prod	119	2.81	0
26	24	mus	11	4	142	prod	161	2.19	0
26	24	mus	11	5	80	prod	101	3.98	0
26	24	mus	11	6	127	prod	161	4.08	0
26	24	mus	11	7	71	prod	76	1.28	0
27	21	mus	12	1	90	id	80	-2	0
27	21	mus	12	2	80	id	71	-2	0
27	21	mus	12	3	113	id	113	0	1
27	21	mus	12	4	142	id	142	0	1
27	21	mus	12	5	71	id	71	0	1
27	21	mus	12	6	101	id	90	-2	0
27	21	mus	12	7	127	id	127	0	1
27	21	mus	12	1	127	prod	113	-1.97	0
27	21	mus	12	2	113	prod	109	-0.58	1
27	21	mus	12	3	80	prod	75	-1.18	0
27	21	mus	12	4	90	prod	94	0.81	1
27	21	mus	12	5	142	prod	119	-3.02	0
27	21	mus	12	6	71	prod	66	-1.28	0
27	21	mus	12	7	101	prod	90	-2.01	0
28	46	non	0	1	80	id	80	0	1
28	46	non	0	2	127	id	113	-2	0
28	46	non	0	3	71	id	71	0	1
28	46	non	0	4	113	id	101	-2	0
28	46	non	0	5	90	id	90	0	1
28	46	non	0	6	142	id	127	-2	0
28	46	non	0	7	101	id	113	2	0
28	46	non	0	1	80	prod	84	0.79	1
28	46	non	0	2	142	prod	233	8.6	0
28	46	non	0	3	101	prod	125	3.63	0
28	46	non	0	4	90	prod	120	5.03	0
28	46	non	0	5	113	prod	160	5.99	0
28	46	non	0	6	71	prod	65	-1.53	0
28	46	non	0	7	127	prod	170	5.01	0
29	24	non	0	1	80	id	71	-2	0
29	24	non	0	2	127	id	101	-4	0
29	24	non	0	3	113	id	90	-4	0
29	24	non	0	4	71	id	71	0	1
29	24	non	0	5	90	id	80	-2	0
29	24	non	0	6	101	id	90	-2	0
29	24	non	0	7	142	id	113	-4	0
29	24	non	0	1	90	prod	126	5.79	0
29	24	non	0	2	113	prod	142	3.91	0
29	24	non	0	3	101	prod	114	2.09	0
29	24	non	0	4	142	prod	131	-1.41	0
29	24	non	0	5	80	prod	95	3.03	0
29	24	non	0	6	127	prod	119	-1.13	0
29	24	non	0	7	71	prod	76	1.24	0
30	27	non	0	1	113	id	101	-2	0
30	27	non	0	2	71	id	80	2	0
30	27	non	0	3	127	id	142	2	0
30	27	non	0	4	101	id	113	2	0
30	27	non	0	5	142	id	142	0	1
30	27	non	0	6	80	id	80	0	1
30	27	non	0	7	90	id	90	0	1
30	27	non	0	1	113	prod	78	-6.52	0
30	27	non	0	2	71	prod	55	-4.4	0
30	27	non	0	3	101	prod	65	-7.59	0
30	27	non	0	4	142	prod	165	2.55	0
30	27	non	0	5	80	prod	53	-7.19	0
30	27	non	0	6	127	prod	97	-4.68	0
30	27	non	0	7	90	prod	64	-6.03	0
